# Supplementary material for: Response of Downy Oak (Quercus pubescens Willd.) to Climate Change: Transcriptome Assembly, Differential Gene Analysis and Targeted Metabolomics
Source: PubMed Central journal article supplement (PMC7570186; doi:10.3390/plants9091149), 2020-09-04
Supplement: plants-09-01149-s001.pdf [file plants-09-01149-s001.pdf]

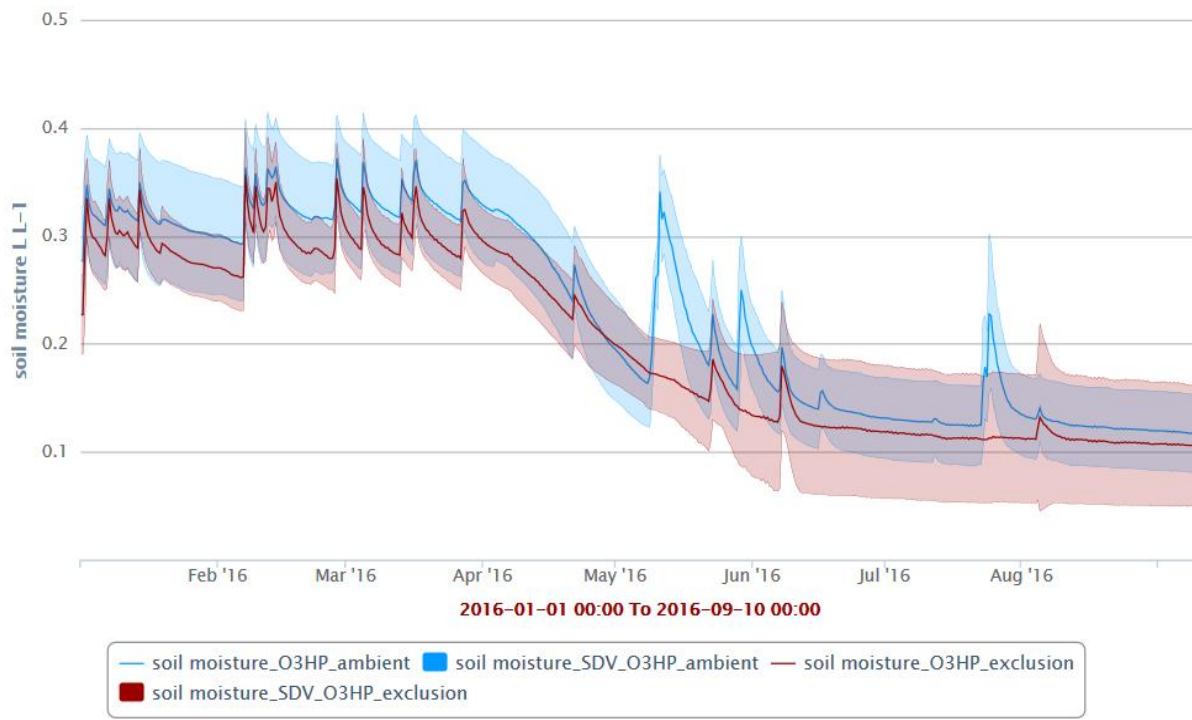

**Supplementary fig. S1.** O<sub>3</sub>HP soil water status taking into account the different sampling dates.

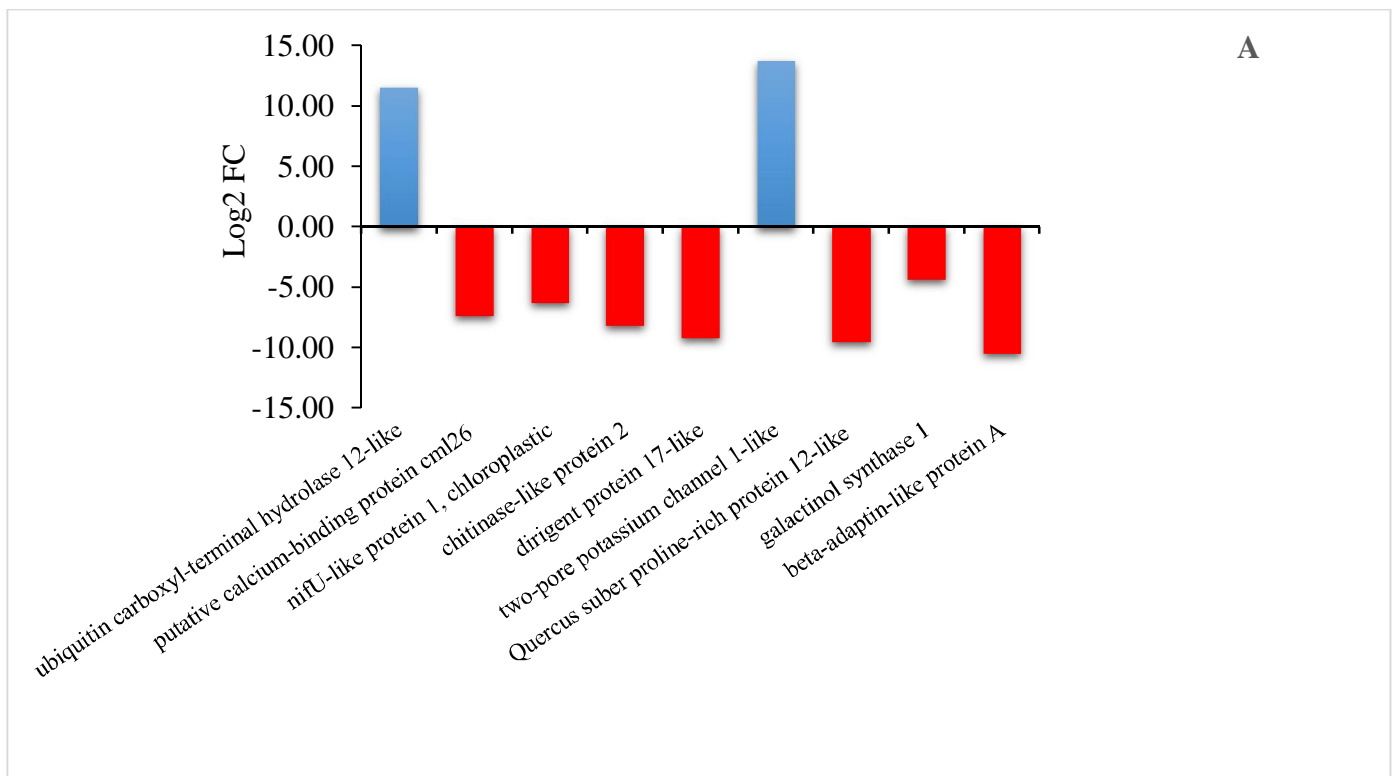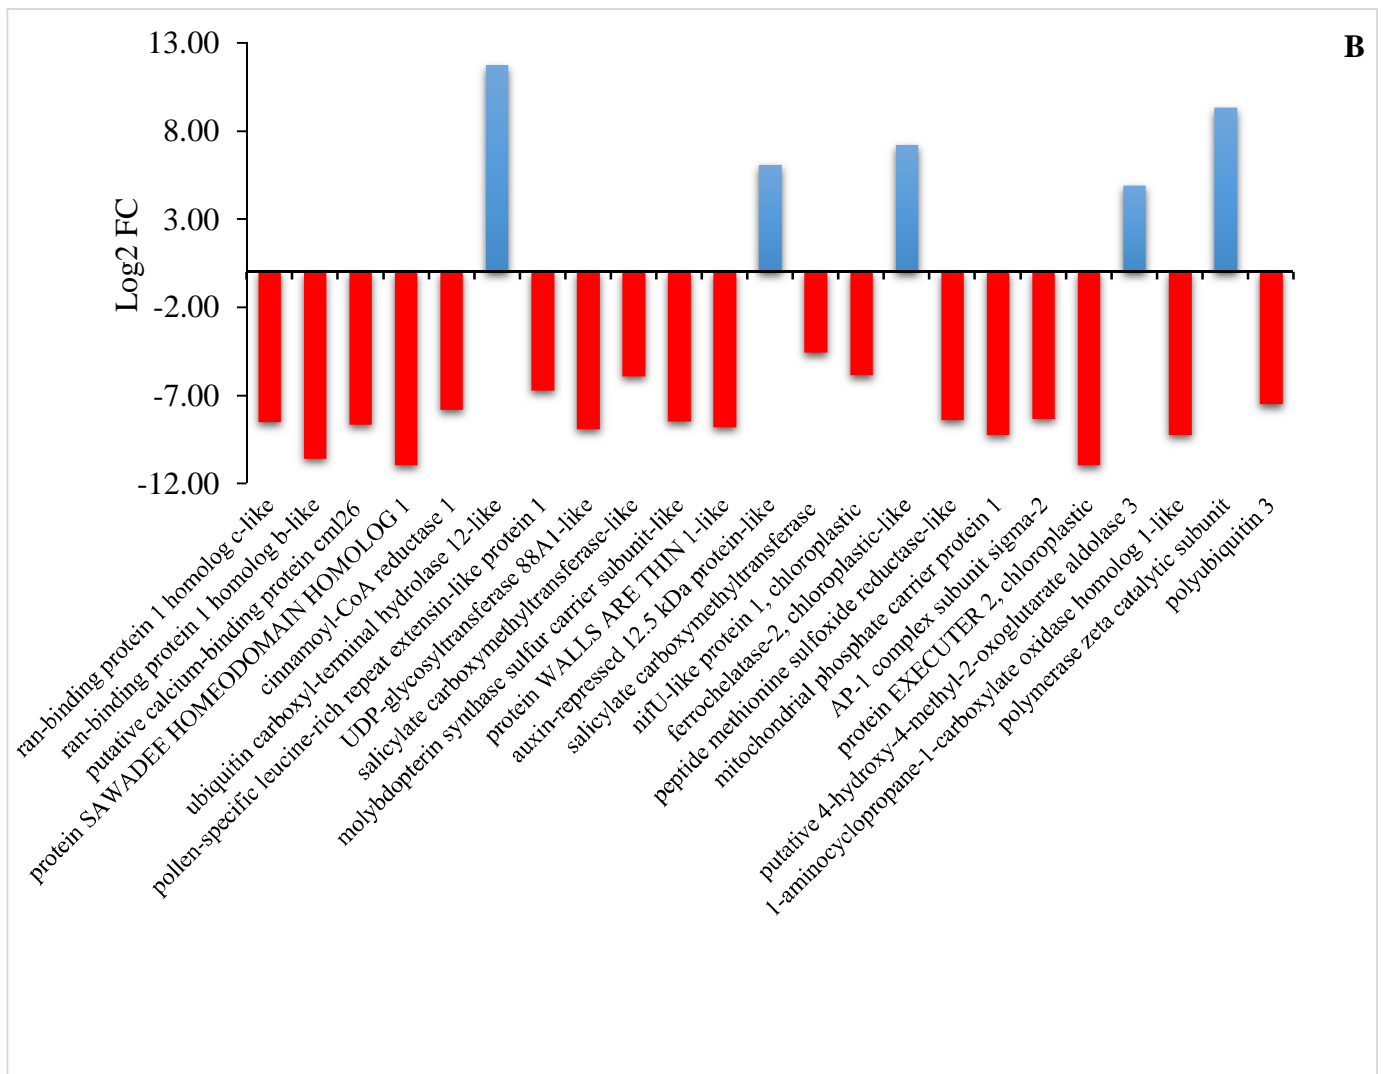

**Supplementary fig. S2.** Differential transcripts of leaves of *Quercus pubescens* annotated from NCBI Blastn search. (a); spring; (b), summer. Blue up-regulated, red: down-regulated features.

| <b>Trinity gene or contig ID</b> | <b>Protein or domain name</b>                               | <b>TAIR ID</b> | <b>Season</b> |
|----------------------------------|-------------------------------------------------------------|----------------|---------------|
| GG_50425_c4_g1_i1                | ubiquitin carboxyl-terminal hydrolase 12-like               | AT5G06600      | Spring        |
| GG_11108_c69_g1_i1               | putative calcium-binding protein cml26                      | AT1G73630      | Spring        |
| GG_14487_c10_g1_i1               | nifU-like protein 1, chloroplastic                          | AT4G01940      | Spring        |
| GG_44881_c17_g1_i1               | chitinase-like protein 2                                    | AT3G16920      | Spring        |
| GG_39825_c29_g1_i1               | dirigent protein 17-like                                    |                | Spring        |
| GG_11622_c28_g1_i1               | two-pore potassium channel 1-like                           |                | Spring        |
| GG_39053_c0_g1_i1                | Quercus suber proline-rich protein 12-like                  |                | Spring        |
| GG_13230_c62_g1_i1               | galactinol synthase 1                                       | AT2G47180      | Spring        |
| GG_4958_c0_g1_i1                 | 28S ribosomal RNA gene, complete sequence                   |                | Spring        |
| GG_41960_c44_g1_i5               | beta-adaptin-like protein A                                 | AT5G11490      | Spring        |
| GG_47228_c14_g1_i2               | ran-binding protein 1 homolog c-like                        | AT5G58590      | Summer        |
| GG_50049_c0_g1_i1                | ran-binding protein 1 homolog b-like                        | AT2G30060      | Summer        |
| GG_11108_c69_g1_i1               | putative calcium-binding protein cml26                      | AT1G73630      | Summer        |
| GG_4958_c0_g1_i1                 | 28S ribosomal RNA gene, complete sequence                   | AT1G80570      | Summer        |
| GG_38843_c72_g1_i1               | protein SAWADEE HOMEODOMAIN HOMOLOG 1                       | AT1G15215      | Summer        |
| GG_14366_c53_g1_i1               | cinnamoyl-CoA reductase 1                                   | AT1G15950      | Summer        |
| GG_50425_c4_g1_i1                | ubiquitin carboxyl-terminal hydrolase 12-like               | AT5G06600      | Summer        |
| GG_22151_c4_g1_i1                | pollen-specific leucine-rich repeat extensin-like protein 1 | AT3G19020      | Summer        |
| GG_53011_c4_g1_i1                | Unknown                                                     |                | Summer        |
| GG_47645_c29_g1_i2               | UDP-glycosyltransferase 88A1-like                           | AT3G16520      | Summer        |
| GG_38151_c33_g1_i1               | salicylate carboxymethyltransferase-like                    |                | Summer        |
| GG_53011_c4_g1_i1                | Unknown                                                     |                | Summer        |
| GG_31096_c0_g1_i1                | molybdopterin synthase sulfur carrier subunit-like          |                | Summer        |
| GG_38972_c72_g1_i2               | protein WALLS ARE THIN 1-like                               | AT1G75500      | Summer        |
| GG_13447_c40_g1_i2               | auxin-repressed 12.5 kDa protein-like                       |                | Summer        |
| GG_7481_c106_g1_i3               | salicylate carboxymethyltransferase                         | AT3G11480      | Summer        |
| GG_14487_c10_g1_i1               | nifU-like protein 1, chloroplastic                          | AT4G01940      | Summer        |
| GG_13694_c66_g1_i4               | ferrochelatase-2, chloroplastic-like                        |                | Summer        |
| GG_40710_c64_g1_i1               | peptide methionine sulfoxide reductase-like                 |                | Summer        |
| GG_49255_c27_g1_i2               | mitochondrial phosphate carrier protein 1                   | AT2G17270      | Summer        |

|                    |                                                          |           |        |
|--------------------|----------------------------------------------------------|-----------|--------|
| GG_54188_c2_g1_i1  | AP-1 complex subunit sigma-2                             | AT4G35410 | Summer |
| GG_9948_c53_g1_i1  | protein EXECUTER 2,<br>chloroplastic                     | AT4G33630 | Summer |
| GG_41580_c36_g1_i1 | putative 4-hydroxy-4-methyl-2-oxoglutarate aldolase 3    | AT5G56260 | Summer |
| GG_17675_c17_g1_i2 | 1-aminocyclopropane-1-carboxylate oxidase homolog 1-like |           | Summer |
| GG_18067_c7_g1_i1  | polymerase zeta catalytic subunit                        | AT1G67500 | Summer |
| GG_41316_c71_g2_i3 | polyubiquitin 3                                          | AT5G03240 | Summer |
| GG_40800_c78_g1_i1 | 30S ribosomal protein S31,<br>chloroplastic              | AT2G38140 | Summer |

**Supplementary Table 1.** *Quercus pubescens* genes or contigs differentially expressed during rain exclusion treatment.
